# Supplementary material for: Metabolites of Geum aleppicum and Sibbaldianthe bifurca: Diversity and α-Glucosidase Inhibitory Potential
Source: MDPI journal article supplement (doi:10.3390/metabo13060689), 2023-05-25
Supplement: s1 [file s1]

# Metabolites of *Geum aleppicum* and *Sibbaldianthe bifurca*: Diversity and $\alpha$ -Glucosidase Inhibitory Potential

Nina I. Kashchenko <sup>1,\*</sup>, Daniil N. Olennikov <sup>1</sup> and Nadezhda K. Chirikova <sup>2</sup>

<sup>1</sup> Laboratory of Medical and Biological Research, Institute of General and Experimental Biology, Siberian Division, Russian Academy of Science, 670047 Ulan-Ude, Russia

<sup>2</sup> Department of Biochemistry and Biotechnology, North-Eastern Federal University, 58 Belinsky Street, 677027 Yakutsk, Russia

\* Correspondence: ninkk@mail.ru; Tel.: +8-983-421-73-40

## Content:

**Table S1.** Regression equations, correlation coefficients ( $r^2$ ), standard deviation ( $S_{yx}$ ), limits of detection (LOD), limits of quantification (LOQ), linear ranges, intra-day, inter-day precisions and recovery of spiked samples for 34 reference standards.

**Figure S1.** Structures of compounds identified in *Geum aleppicum* and *Sibbaldianthe bifurca*.

**Table S1.** Regression equations, correlation coefficients ( $r^2$ ), standard deviation ( $S_{yx}$ ), limits of detection (LOD), limits of quantification (LOQ), linear ranges, intra-day, inter-day precisions and recovery of spiked samples for 34 reference standards.

| Compound                                 | CE <sup>a</sup><br>(eV) | Regression equation <sup>b</sup> |                   | $r^2$  | Syx                   | LOD/L<br>OQ<br>( $\mu\text{g/mL}$ ) | Linear<br>Range<br>( $\mu\text{g/mL}$ ) | RSD%<br>(Intra-<br>Day) | RSD%<br>(Inter-<br>Day) | Recovery<br>of Spiked<br>Sample<br>REC% |
|------------------------------------------|-------------------------|----------------------------------|-------------------|--------|-----------------------|-------------------------------------|-----------------------------------------|-------------------------|-------------------------|-----------------------------------------|
|                                          |                         | a                                | $b \cdot 10^{-6}$ |        |                       |                                     |                                         |                         |                         |                                         |
| Saccharose                               | -10                     | 1.6278                           | -0.0428           | 0.9990 | $7.11 \cdot 10^{-2}$  | 0.14/0.44                           | 1.0–100.0                               | 0.97                    | 1.16                    | 98.34                                   |
| Glucose                                  | -10                     | 1.5632                           | -0.0376           | 0.9983 | $5.14 \cdot 10^{-2}$  | 0.11/0.33                           | 1.0–100.0                               | 1.23                    | 1.54                    | 100.07                                  |
| Malic acid                               | -10                     | 0.9911                           | -0.0379           | 0.9988 | $2.05 \cdot 10^{-2}$  | 0.07/0.21                           | 1.0–100.0                               | 1.09                    | 1.36                    | 99.12                                   |
| Citric acid                              | -10                     | 0.9518                           | -0.0267           | 0.9990 | $1.03 \cdot 10^{-2}$  | 0.03/0.10                           | 1.0–100.0                               | 1.34                    | 1.78                    | 102.03                                  |
| 2-Pyrone-4,6-dicarboxylic acid           | -10                     | 0.9804                           | -0.0210           | 0.9970 | $2.01 \cdot 10^{-2}$  | 0.06/0.21                           | 1.0–100.0                               | 1.47                    | 1.64                    | 100.78                                  |
| Gallic acid                              | -20                     | 2.6538                           | -0.1376           | 0.9990 | $1.17 \cdot 10^{-2}$  | 0.01/0.04                           | 1.0–100.0                               | 1.22                    | 1.43                    | 101.22                                  |
| 3,4-Dihydroxybenzoic acid<br>4-O-Glc     | -20                     | 0.9214                           | -0.0373           | 0.9997 | $2.10 \cdot 10^{-2}$  | 0.07/0.22                           | 1.0–100.0                               | 1.31                    | 1.57                    | 99.83                                   |
| 3,4,5-Trihydroxybenzaldehyde             | -15                     | 0.9320                           | -0.0523           | 0.9991 | $4.14 \cdot 10^{-2}$  | 0.15/0.44                           | 1.0–100.0                               | 1.40                    | 1.98                    | 100.39                                  |
| Pedunculagin                             | -35                     | 0.6370                           | -0.4521           | 0.9872 | $6.11 \cdot 10^{-2}$  | 0.32/0.96                           | 1.0–100.0                               | 0.99                    | 1.60                    | 102.55                                  |
| 1-O- <i>p</i> -Hydroxybenzoic acid O-Glc | -20                     | 1.3586                           | -0.0663           | 0.9987 | $9.69 \cdot 10^{-2}$  | 0.24/0.71                           | 1.0–100.0                               | 1.38                    | 1.88                    | 101.14                                  |
| Casuarinin                               | -20                     | 1.0634                           | -0.0933           | 0.9902 | $10.01 \cdot 10^{-2}$ | 0.31/0.94                           | 1.0–100.0                               | 0.89                    | 1.29                    | 100.64                                  |
| Tellimagrandin I <sub>1</sub>            | -35                     | 0.9634                           | -0.3518           | 0.9804 | $7.34 \cdot 10^{-2}$  | 0.25/0.76                           | 1.0–100.0                               | 1.12                    | 1.42                    | 99.23                                   |
| Tellimagrandin I <sub>2</sub>            | -35                     | 1.4267                           | -0.5637           | 0.9907 | $12.72 \cdot 10^{-2}$ | 0.29/0.89                           | 1.0–100.0                               | 1.33                    | 1.61                    | 100.11                                  |
| Rugosin E <sub>1</sub>                   | -20                     | 1.6341                           | -0.4283           | 0.9900 | $15.02 \cdot 10^{-2}$ | 0.30/0.92                           | 1.0–100.0                               | 1.45                    | 1.92                    | 101.27                                  |
| Casuarinin                               | -20                     | 0.9634                           | -0.8634           | 0.9832 | $10.37 \cdot 10^{-2}$ | 0.36/1.07                           | 1.0–100.0                               | 1.29                    | 1.43                    | 98.26                                   |
| Rugosin E <sub>2</sub>                   | -20                     | 1.4238                           | -0.0891           | 0.9901 | $7.33 \cdot 10^{-2}$  | 0.17/0.52                           | 1.0–100.0                               | 1.15                    | 1.39                    | 99.30                                   |
| Potentillin                              | -20                     | 1.5152                           | -0.0523           | 0.9979 | $12.67 \cdot 10^{-2}$ | 0.28/0.84                           | 1.0–100.0                               | 1.28                    | 1.66                    | 100.78                                  |
| Casuarictin                              | -20                     | 0.8237                           | -0.7310           | 0.9801 | $14.73 \cdot 10^{-2}$ | 0.59/1.79                           | 1.0–100.0                               | 1.36                    | 1.75                    | 101.33                                  |
| Agrimoniin                               | -35                     | 0.8214                           | -0.2716           | 0.9893 | $5.37 \cdot 10^{-2}$  | 0.22/0.65                           | 1.0–100.0                               | 1.44                    | 1.84                    | 102.00                                  |

|                                     |     |        |         |        |                       |           |           |      |      |        |
|-------------------------------------|-----|--------|---------|--------|-----------------------|-----------|-----------|------|------|--------|
| Gemin A                             | -35 | 1.4412 | -0.6211 | 0.9930 | $11.25 \cdot 10^{-2}$ | 0.26/0.78 | 1.0–100.0 | 1.39 | 1.90 | 100.36 |
| Tellimagrandin II <sub>2</sub>      | -35 | 0.9361 | -0.4518 | 0.9870 | $9.35 \cdot 10^{-2}$  | 0.32/1.00 | 1.0–100.0 | 1.42 | 1.73 | 101.17 |
| Quercetin-3-O-GlcA                  | -20 | 1.6705 | -0.4374 | 0.9988 | $12.79 \cdot 10^{-2}$ | 0.25/0.77 | 1.0–100.0 | 1.21 | 1.48 | 102.08 |
| Quercetin-3-O-Glc                   | -20 | 1.1103 | -0.9217 | 0.9901 | $14.33 \cdot 10^{-2}$ | 0.42/1.29 | 1.0–100.0 | 1.08 | 1.55 | 99.39  |
| Quercetin-7-O-Glc                   | -20 | 1.2703 | -0.7911 | 0.9814 | $15.26 \cdot 10^{-2}$ | 0.40/1.20 | 1.0–100.0 | 1.14 | 1.69 | 101.21 |
| Quercetin-3-O-Ara                   | -20 | 1.4412 | -0.6211 | 0.9930 | $11.25 \cdot 10^{-2}$ | 0.26/0.78 | 1.0–100.0 | 1.25 | 1.58 | 102.05 |
| Quercetin-3-O-(6''-O-Cin)-Glc       | -20 | 1.2703 | -0.7911 | 0.9814 | $15.26 \cdot 10^{-2}$ | 0.40/1.20 | 1.0–100.0 | 1.30 | 2.01 | 99.32  |
| Ellagic acid                        | -30 | 0.9114 | -0.6312 | 0.9887 | $6.37 \cdot 10^{-2}$  | 0.23/0.70 | 1.0–100.0 | 1.16 | 1.97 | 100.84 |
| Kaempferol-3-O-Glc                  | -20 | 2.0859 | -0.9171 | 0.9980 | $6.18 \cdot 10^{-2}$  | 0.03/0.09 | 1.0–100.0 | 1.23 | 1.83 | 101.23 |
| Kaempferol-3-O-GlcA                 | -30 | 2.2126 | -0.5160 | 0.9987 | $8.11 \cdot 10^{-2}$  | 0.12/0.37 | 1.0–100.0 | 1.08 | 1.60 | 98.33  |
| Niga-ichigoside F1                  | -30 | 2.0319 | -0.3615 | 0.9811 | $10.09 \cdot 10^{-2}$ | 0.17/0.52 | 1.0–100.0 | 1.05 | 1.36 | 100.50 |
| Rosamultin (tormentenic acid O-Glc) | -30 | 1.5364 | -0.3614 | 0.9927 | $10.07 \cdot 10^{-2}$ | 0.22/0.66 | 1.0–100.0 | 1.12 | 1.44 | 102.13 |
| Tormentenic acid                    | -30 | 1.5330 | -0.0863 | 0.9985 | $4.15 \cdot 10^{-2}$  | 0.09/0.27 | 1.0–100.0 | 1.39 | 1.78 | 100.09 |
| Corosolic acid                      | -30 | 2.3312 | -0.4563 | 0.9803 | $14.92 \cdot 10^{-2}$ | 0.21/0.64 | 1.0–100.0 | 1.24 | 1.85 | 101.40 |
| Ursolic acid                        | -30 | 1.2820 | -0.9634 | 0.9697 | $11.64 \cdot 10^{-2}$ | 0.30/0.91 | 1.0–100.0 | 1.41 | 1.91 | 99.54  |

<sup>a</sup> CE – collision energy. <sup>b</sup> Regression equation:  $y = a \cdot x + b$ .

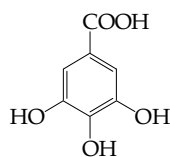

Gallic acid

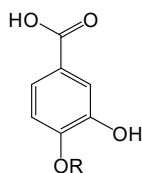

3,4-Dihydroxybenzoic acid 4-O-Glc: R = Glc

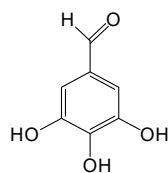

3,4,5-Trihydroxybenzaldehyde

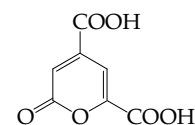

2-Pyrone-4,6-dicarboxylic acid

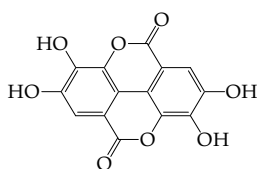

Ellagic acid

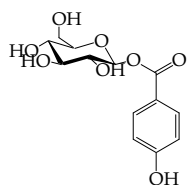

1-O-*p*-Hydroxybenzoyl glucose

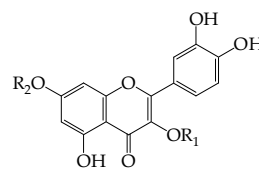

Quercetin-3-O-GlcA: R<sub>1</sub> = GlcA; R<sub>2</sub> = H

Quercetin-3-O-Glc: R<sub>1</sub> = Glc; R<sub>2</sub> = H

Quercetin-3-O-Ara: R<sub>1</sub> = Ara; R<sub>2</sub> = H

Quercetin-3-O-(6''-O-Cin)-Glc: R<sub>1</sub> = (6''-O-Cin)-Glc; R<sub>2</sub> = H

Quercetin-7-O-Glc: R<sub>1</sub> = H; R<sub>2</sub> = Glc

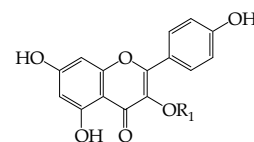

Kaempferol-3-O-GlcA: R<sub>1</sub> = GlcA

Kaempferol-3-O-Glc: R<sub>1</sub> = Glc

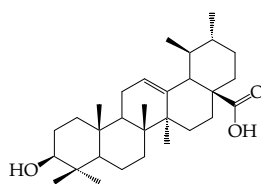

Ursolic acid

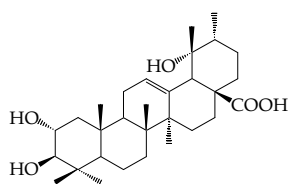

Tormentenic acid

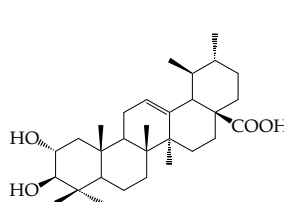

Corosolic acid

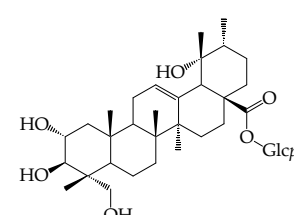

Niga-ichigoside F<sub>1</sub>

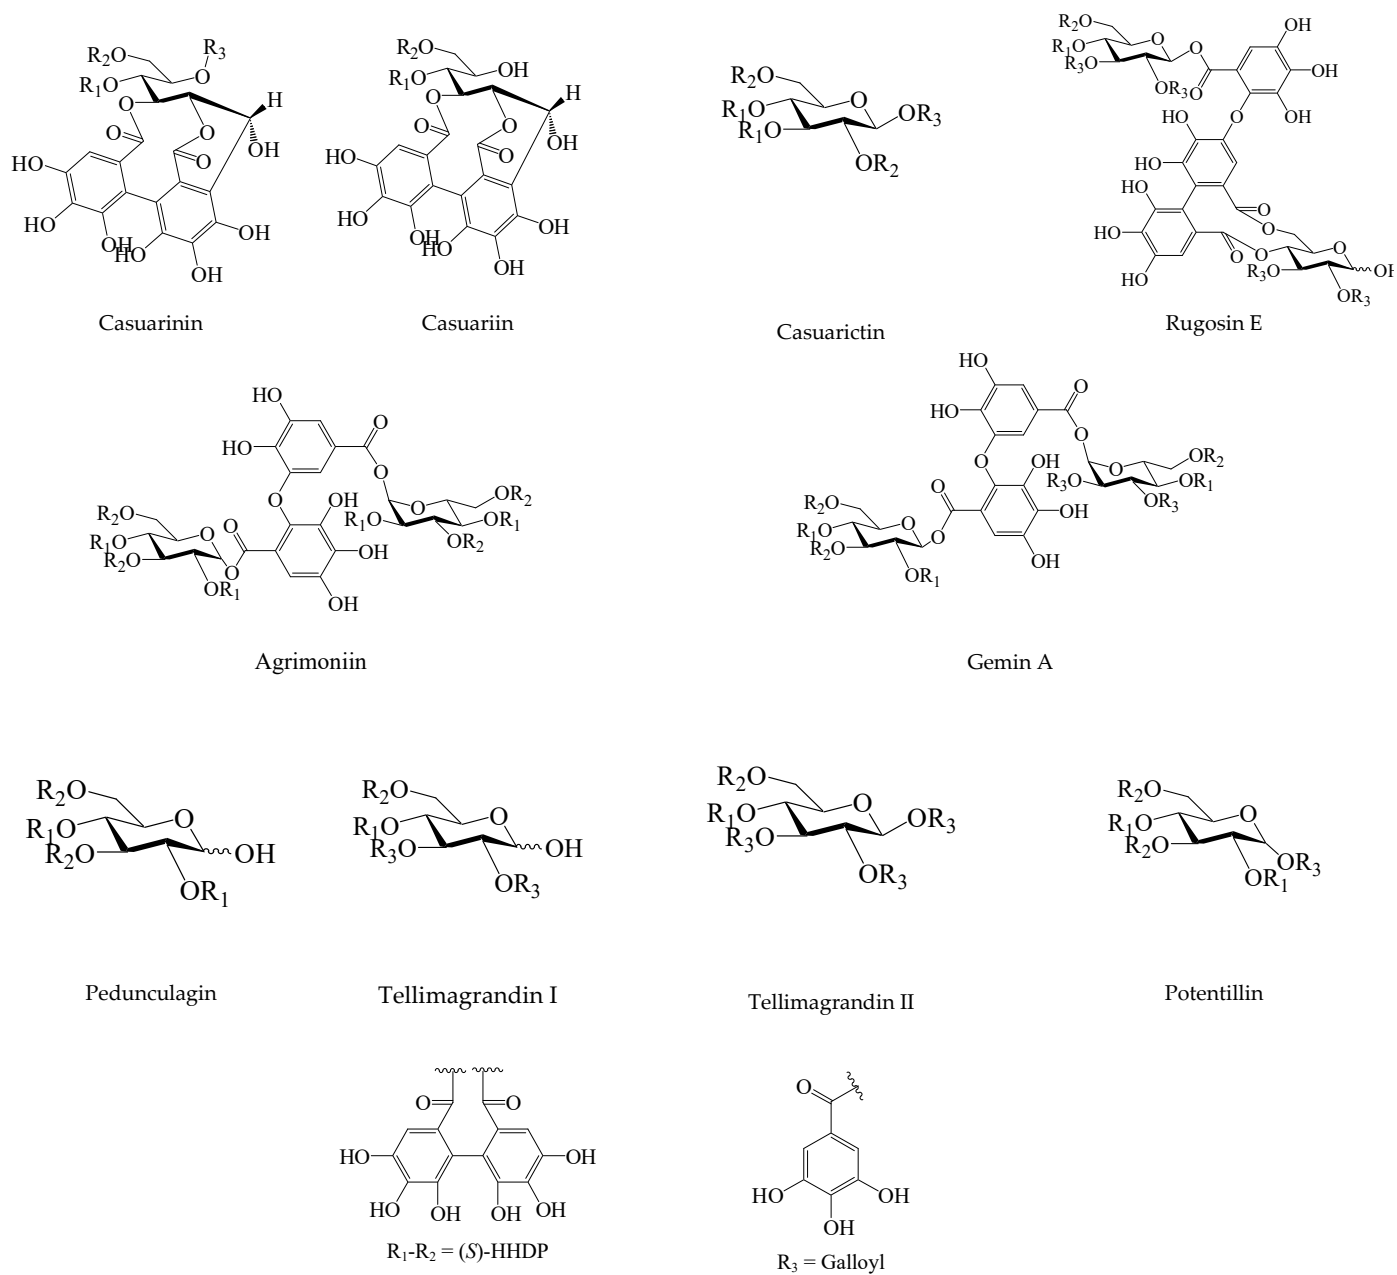

**Figure S1.** Structures of compounds identified in *Geum aleppicum* and *Sibbaldianthe bifurca*. Abbreviation used: Glc – glucose; GlcA – glucuronic acid; Ara – arabinose; Cin – cinnamoyl; HHDP – hexahydroxydiphenoyl.
